# Supplementary material
Source: Springer Nature journal article supplement (https://www.springermedizin.de/resource/supplementary/12865_2006_93_MOESM4_ESM.pdf/9428562)

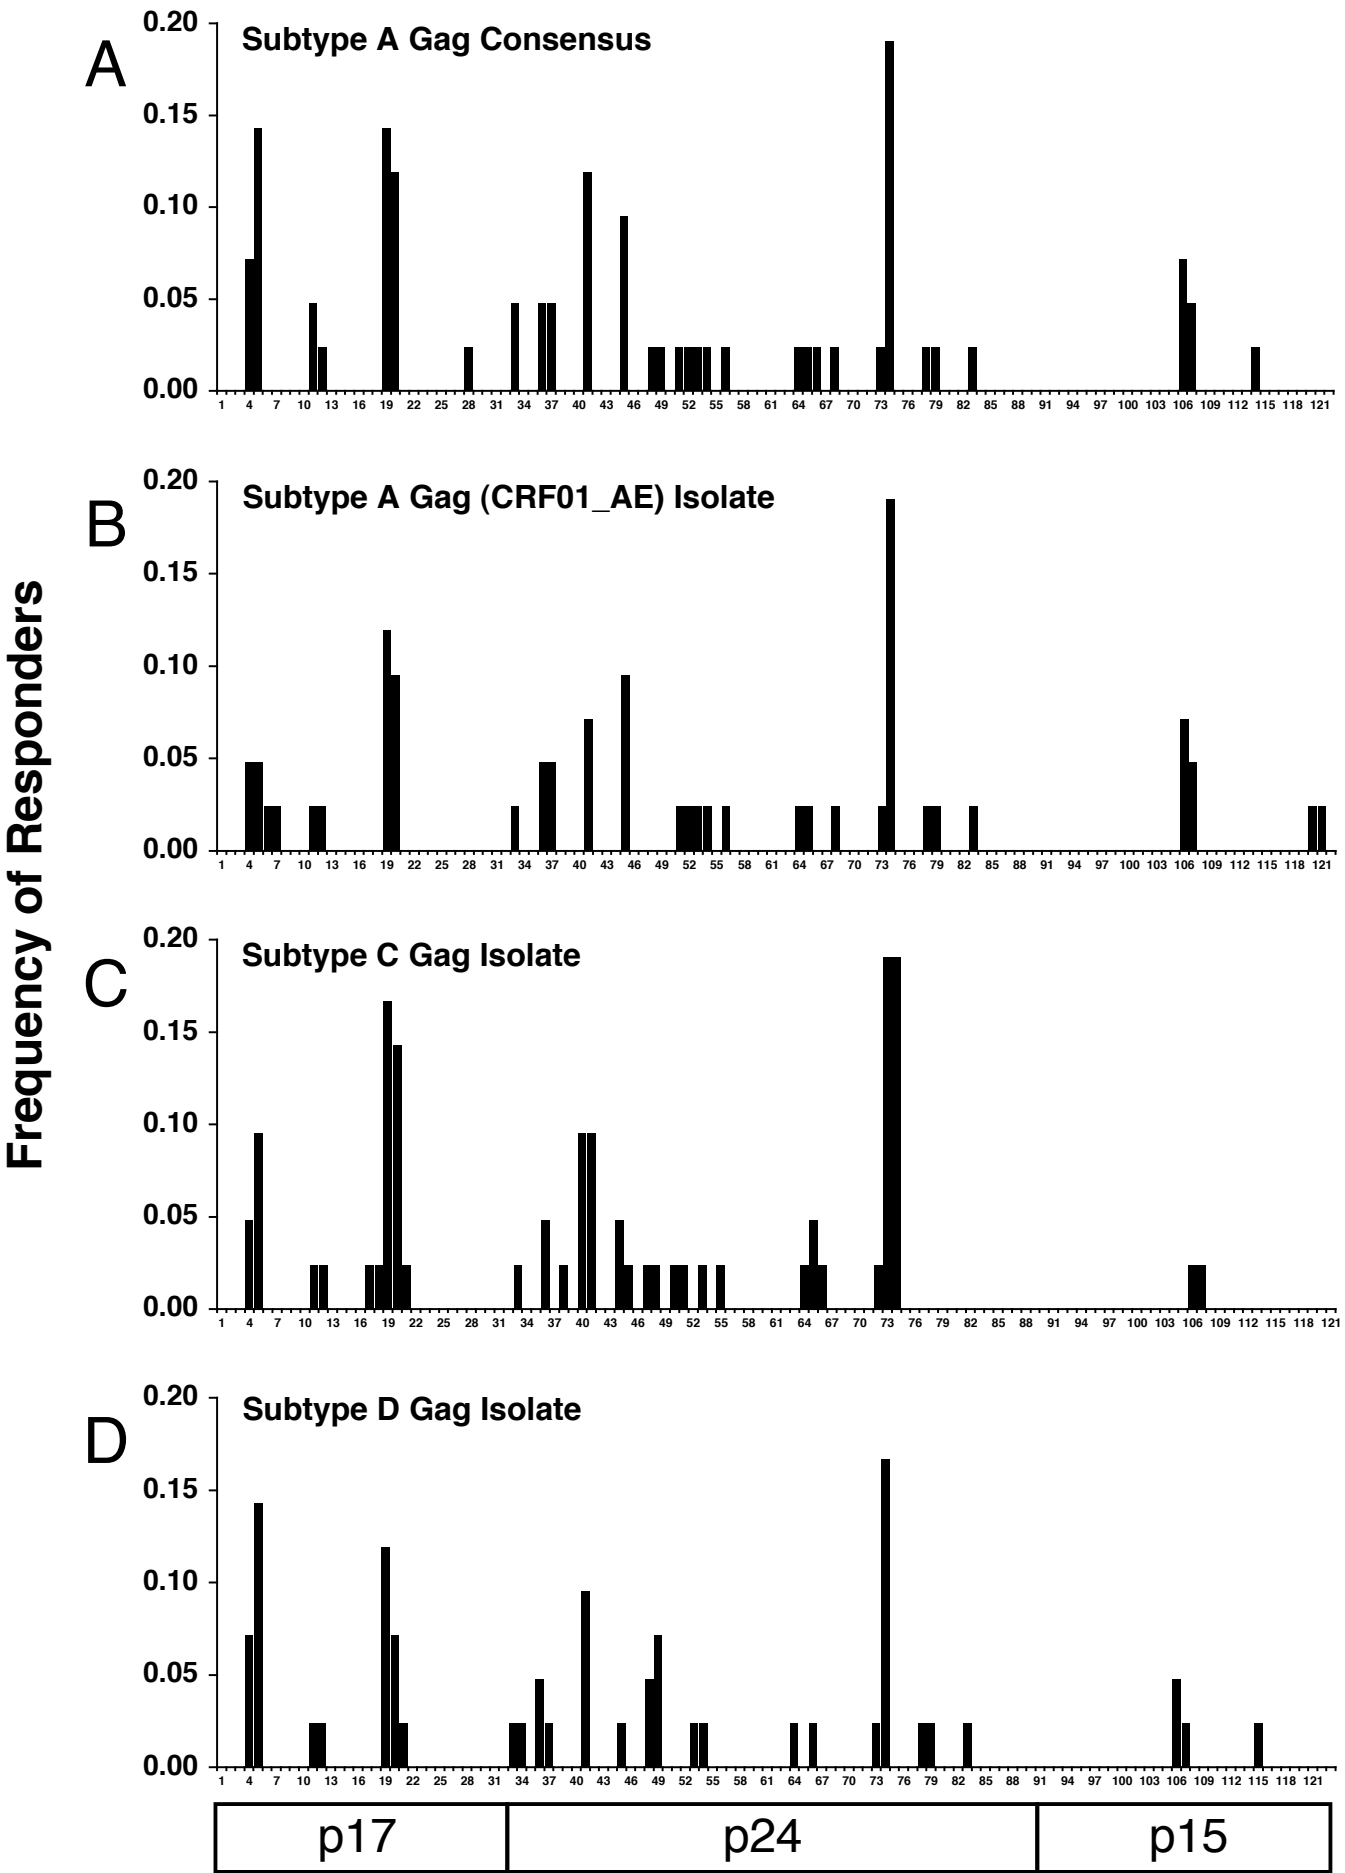

Supplement: MOESM4 [file 9428562]
